# Supplementary material
Source: publisher site journal article supplement (https://www.dovepress.com/get_supplementary_file.php?f=455276.docx)
Supplement: Supplementary file 1 [file get_supplementary_file.php]

**Supplementary materials**

**Supplementary Table 1** Correlates of BMD, OSTA index, and FEV1/FVC

|  | Correlates of BMD | | Correlates of OSTA index | | Correlates of FEV1/FVC | |
| --- | --- | --- | --- | --- | --- | --- |
|  | *r* | *p*-value | *r* | *p*-value | *r* | *p*-value |
| Age | -0.211*** | <0.001 | – | – | -0.292*** | <0.001 |
| Body weight | 0.405*** | <0.001 | – | – | -0.018*** | 0.479 |
| OSTA | 0.432*** | <0.001 | – | – | – | – |
| Height | 0.236*** | <0.001 | 0.454*** | <0.001 | 0.035 | 0.166 |
| Abdominal circumference | 0.238*** | <0.001 | 0.488*** | <0.001 | -0.060* | 0.018 |
| BMI | 0.304*** | <0.001 | 0.543*** | <0.001 | -0.028 | 0.261 |
| FEV1/FVC | 0.026 | 0.294 | 0.179*** | <0.001 | – | – |
| FEV1% predicted | 0.046 | 0.068 | -0.022 | 0.374 | – | – |
| FEV1 | 0.225*** | <0.001 | 0.456*** | <0.001 | – | – |
| FVC | 0.234*** | <0.001 | 0.426*** | <0.001 | – | – |
| Pack year | -0.006 | 0.797 | 0.103*** | <0.001 | -0.066** | 0.008 |
| Creatinine | 0.115*** | <0.001 | 0.012 | 0.641 | -0.033 | 0.196 |
| eGFR | -0.068** | 0.007 | 0.122*** | <0.001 | 0.087** | 0.001 |
| Fasting glucose | 0.109*** | <0.001 | 0.092*** | <0.001 | 0.011 | 0.675 |
| FT4 | -0.010 | 0.765 | -0.016 | 0.626 | 0.056 | 0.089 |
| TSH | 0.014 | 0.664 | -0.139*** | <0.001 | -0.043 | 0.194 |
| WBC count | 0.030 | 0.240 | 0.129*** | <0.001 | -0.047 | 0.061 |
| hsCRP | 0.094*** | <0.001 | 0.186*** | <0.001 | -0.058* | 0.021 |

**Notes:** * *p*-value < 0.05; ** *p*-value < 0.01; *** *p*-value < 0.001

**Abbreviations:** BMD, bone mineral density; BMI, body mass index; eGFR, estimated glomerular filtration rate; FVC, forced vital capacity; FEV1, forced expiratory volume in one second; FT4, free thyroxine; hsCRP, hypersensitivity C-reactive protein; OSTA, osteoporosis self-assessment tool for Asians; TSH, thyroid stimulating hormone; WBC, White blood cell

**Supplementary Table 2** Multivariable linear regression analysis of BMD

|  | **Model 1** | | **Model 2** | | **Model 3** | | **Model 4** | | **Model 5** | | **Model 6** | |
| --- | --- | --- | --- | --- | --- | --- | --- | --- | --- | --- | --- | --- |
|  | ***β*** | ***p*-value** | ***β*** | ***p*-value** | ***β*** | ***p*-value** | ***β*** | ***p*-value** | ***β*** | ***p*-value** | ***β*** | ***p*-value** |
| Age | − | − | − | − | − | − | -0.182*** | <0.001 | -0.181*** | <0.001 | -0.272*** | <0.001 |
| Height | 0.054 | 0.065 | 0.040 | 0.179 | 0.049 | 0.062 | − | − | − | − | − | − |
| BMI | − | − | − | − | − | − | 0.341*** | <0.001 | 0.341*** | <0.001 | 0.333*** | <0.001 |
| OSTA index | 0.420*** | <0.001 | 0.413*** | <0.001 | 0.427*** | <0.001 | − | − | − | − | − | − |
| FEV1 | -0.006 | 0.837 | − | − | − | − | − | − | 0.144*** | <0.001 | − | − |
| FVC | − | − | 0.023 | 0.435 | − | − | 0.164*** | <0.001 | − | − | − | − |
| FEV1/FVC | − | − | − | − | -0.041 | 0.079 | − | − | − | − | -0.034 | 0.174 |
| Creatinine | 0.119*** | <0.001 | 0.119*** | <0.001 | 0.118*** | <0.001 | 0.115*** | <0.001 | 0.119*** | <0.001 | 0.134*** | <0.001 |
| Fasting glucose | 0.082** | 0.001 | 0.084*** | <0.001 | 0.083*** | <0.001 | 0.059* | 0.017 | 0.055* | 0.028 | 0.065* | 0.010 |
| hsCRP | -0.009 | 0.704 | -0.008 | 0.743 | -0.011 | 0.638 | -0.020 | 0.395 | -0.019 | 0.414 | -0.026 | 0.274 |

**Notes:** * *p*-value < 0.05; ** *p*-value < 0.01; *** *p*-value < 0.001

**Abbreviations:** BMI, body mass index; FVC, forced vital capacity; FEV1, forced expiratory volume in one second; hsCRP, hypersensitivity C-reactive protein; OSTA, osteoporosis self-assessment tool for Asians; BMD, bone mineral density

**Supplementary Table 3** Prevalence of osteopenia and osteoporosis according to OSTA risk level

|  | OSTA risk level | | |  |
| --- | --- | --- | --- | --- |
|  | Low n = 645 | Moderate n = 752 | High n = 183 | *p*-value |
| **Normal** | 222 (34.4) | 105 (14.0) | 13 (7.1) | <0.001 |
| **Osteopenia** | 366 (56.8) | 440 (58.5) | 80 (43.7) |  |
| **Osteoporosis** | 57 (8.8) | 207 (27.5) | 90 (49.2) |  |

**Notes:** Data are expressed as number (n) (percentage)
OSTA index: 0.2 × {BW (kg) - age}
OSTA risk level was defined as follows; low (>-1), moderate (-4 to -1), and high (<-4).
Osteopenia and osteoporosis were diagnosed according to the WHO diagnostic criteria.

**Abbreviations:** OSTA, osteoporosis self-assessment tool for Asians; WHO, World Health Organization; BW, body weight

**Supplementary Table 4** Association between bone mineral density and AL

|  | Bone mineral density | | | | |
| --- | --- | --- | --- | --- | --- |
|  | Normal n=340 | Osteopenia n=886 | *p-*Value | Osteoporosis n=354 | *p-*Value |
| Crude | Reference | 1.28 (0.68–2.42) | 0.441 | 2.16 (1.10–4.25) | 0.025 |
| Adjusted | Reference | 1.03 (0.51–2.09) | 0.935 | 1.20 (0.54–2.67) | 0.664 |

**Notes:**Adjusted model: Adjusted for age, BMI, physical activity, alcohol consumption, smoking status, the current use of medication for diabetes and hyperglycemia, the current use of medication for rheumatoid arthritis, exposure to second-hand smoke, and removal of the ovary.
Osteopenia and osteoporosis were diagnosed according to the WHO diagnostic criteria.
AL was defined as FEV1/FVC <0.7. **Abbreviations:** AL, airflow limitation; BMI, body mass index; FVC, forced vital capacity; FEV1, forced expiratory volume in one second; WHO, World Health Organization

**Supplementary** **Table 5** AL severity, according to the GOLD

|  | OSTA risk level | | |  |
| --- | --- | --- | --- | --- |
|  | Low n = 645 | Moderate n = 752 | High n = 183 | *p*-value |
| **Normal pulmonary function** | 625 (96.9) | 716 (95.2) | 155 (84.7) | <0.001 |
| **Mild AL** | 15 (2.3) | 28 (3.7) | 22 (12.2) |  |
| **Moderate AL** | 5 (0.8) | 8 (1.1) | 6 (3.3) |  |

**Notes:** Normal pulmonary function was defined as FEV1/FVC ≥70% and % FEV1 ≥80% predicted.
The criteria used for AL staging were also developed according to the GOLD guidelines, as　follows: Stage I (mild AL): FEV1/FVC < 70% and %FEV1 ≥ 80%;
Stage II (moderate AL): FEV1/FVC < 70% and 50% ≤ %FEV1 < 80%;
Stage III (severe AL): FEV1/FVC < 70% and 30% ≤ %FEV1 < 50%;
Stage IV (very severe AL): FEV1/FVC < 70% and %FEV1 < 30%.

**Abbreviations:** AL, airflow limitation; FVC, forced vital capacity; FEV1, forced expiratory volume in one second; GOLD, Global Initiative for Chronic Obstructive Lung Disease; OSTA, the osteoporosis self-assessment tool for Asians
